# Supplementary material
Source: PubMed Central journal article supplement (PMC7039663)
Supplement: NIHMS1553115-supplement-Supp_T_1.pdf [file NIHMS1553115-supplement-Supp_T_1.pdf]

## Supplementary Table 1: Included Study Demographics

Text Summary: An inclusive overview of demographics and study content for all research studies included in the meta-analysis

| Author (Year)          | Gene   | Allelic Variant     | N (Male/Female)<br>Mean Age | Ancestry                                                                                           | Study Design                             | Dosage<br>(see footnotes)                                                                                                                     | Improvement Scale<br>Analyzed | Additional<br>Improvement Scales | Sub-outcomes Assessed                                     | Result                                                 |
|------------------------|--------|---------------------|-----------------------------|----------------------------------------------------------------------------------------------------|------------------------------------------|-----------------------------------------------------------------------------------------------------------------------------------------------|-------------------------------|----------------------------------|-----------------------------------------------------------|--------------------------------------------------------|
| Kim et al (2010)       | SLC6A2 | rs28386840<br>(A/T) | 112 (92/20) 9.1             | -                                                                                                  | Observational; Single<br>Arm; Open Label | Baseline: 19.9 mg/day<br>Final 2 weeks:<br>29.2mg/day <sup>1</sup>                                                                            | ARS-IV, CGI-I                 | -                                | Poor Response                                             | T allele associated with<br>improved response          |
| Park et al (2012)      | SLC6A2 | rs28386840<br>(A/T) | 53 (45/8) 9                 | Korean                                                                                             | Observational; Single<br>Arm; Open Label | 0.86mg/kg/day <sup>1</sup>                                                                                                                    | CPT                           | -                                | Poor Response                                             | T allele associated with<br>improved response          |
| Hong et al (2012)      | SLC6A2 | rs28386840<br>(A/T) | 103 (-/-) 9.1               | Korean                                                                                             | Observational; Single<br>Arm; Open Label | Baseline: 19.8 mg/day <sup>1</sup><br>At 8 weeks:<br>29.1mg/day <sup>3</sup>                                                                  | ARS-IV, CGI-I                 | -                                | Poor Response                                             | T allele associated with<br>improved response          |
| Yang et al (2004)      | SLC6A2 | rs5569<br>(G/A)     | 45 (35/10) 10.1             | Han Chinese                                                                                        | Observational; Single<br>Arm; Open Label | 0.45-0.60mg/kg/day <sup>1</sup>                                                                                                               | ARS-IV                        | -                                | Poor Response                                             | G allele carriers associated<br>with improved response |
| McGough et al (2009)   | SLC6A2 | rs5569<br>(G/A)     | 77(-/-) 9.8                 | Non-Hispanic<br>white (51%),<br>Hispanic white<br>(24%), Black (13%),<br>Asian (9%), Other<br>(2%) | Randomized; Cross-<br>Over; Double Blind | Patients weighing<br><25kg: one week each<br>of 5mg,10mg,15mg<br>three times daily.<br>>25kg: additional week<br>of 20mg three times<br>daily | ARS-IV, SWAN                  | PERMP                            | Poor Response; Gene x<br>Dose Interaction<br>Side effects | No association                                         |
| Kim et al (2010)       | SLC6A2 | rs5569<br>(G/A)     | 112 (92/20) 9.1             | -                                                                                                  | Observational; Single<br>Arm; Open Label | Baseline: 19.9 mg/day<br>Final 2 weeks:<br>29.2mg/day <sup>1</sup>                                                                            | ARS-IV, CGI-I                 | -                                | Poor Response                                             | No association                                         |
| Song et al (2011)      | SLC6A2 | rs5569<br>(G/A)     | 114 (95/19) 9.1             | Korean                                                                                             | Observational; Single<br>Arm; Open Label | 29.47mg/day <sup>2</sup><br>37.8 mg/day <sup>3</sup>                                                                                          | ARS-IV, CGI-S                 | -                                | Poor Response                                             | G/G associated with<br>improved response               |
| Lee et al (2011)       | SLC6A2 | rs5569<br>(G/A)     | 112 (93/19)<br>10.2         | Korean                                                                                             | Observational; Single<br>Arm; Open Label | 0.85mg/kg/day <sup>3</sup>                                                                                                                    | K-ARS, CGI-I                  | CGI-S                            | Poor Response                                             | No association                                         |
| Hong et al (2012)      | SLC6A2 | rs5569<br>(G/A)     | 103 (-/-) 9.1               | Korean                                                                                             | Observational; Single<br>Arm; Open Label | Baseline: 19.8 mg/day <sup>1</sup><br>At 8 weeks:<br>29.1mg/day <sup>3</sup>                                                                  | ARS-IV, CGI-I                 | -                                | Poor Response                                             | G/G associated with<br>improved response               |
| Park et al (2012)      | SLC6A2 | rs5569<br>(G/A)     | 53 (45/8) 9                 | Korean                                                                                             | Observational; Single<br>Arm; Open Label | 0.86mg/kg/day <sup>1</sup>                                                                                                                    | CPT                           | -                                | Poor Response                                             | G/G associated with<br>improved response               |
| Polanczyk et al (2007) | ADRA2A | rs1800544<br>(G/C)  | 106 (82/24)<br>10.3         | European-Brazilian                                                                                 | Non-randomized;<br>Quasi-experimental    | Baseline: 0.5<br>mg/kg/day 1 month:                                                                                                           | SNAP-IV                       | SNAP-IV<br>Hyperactivity-        | Poor Response;<br>Response Rate                           | G allele associated with<br>improved response          |

Dosage Strategy Descriptors: <sup>1</sup> Mean doses reported; <sup>2</sup> Fixed dose; <sup>3</sup> Mean at endpoint; <sup>4</sup> Mean of total duration average across groups; <sup>5</sup> Mean maximum dose; <sup>6</sup> Mean overall dose; <sup>7</sup> Final dose range. All studies reported use of MPH unless otherwise noted: \* Indicates use of OROS MPH, and, \*\* indicates use of MPH IR. SNAP-IV, Swanson, Nolan, and Pelham Scale – Version IV; CGI-I, Clinical Global Impression – Improvement; CBCL, Child Behaviour Checklist; WCST, Wisconsin Card Sorting Test; FW, Finger Windows; TOL, Tower of London test; SOPT, Self-Ordered Pointing Task; CPT, Conners’ Continuous Performance Test; RAST, Restricted Academic Situation Scale Task; DA, Delay Aversion; K-ARS, Korean version of ADHD Rating Scale; ARS-IV, ADHD Rating Scale – Version IV; PERMP, Permanent Product Measure of Performance; VADPRS, Vanderbilt ADHD Parent Rating Scales; VADTRS, Vanderbilt ADHD Teacher Rating Scales; SWAN, Strengths and Weaknesses of ADHD-Symptoms and Normal Behavior Scale; CGAS, Children Global Assessment Scale; CAT, Comprehensive Attention Test; SERS, Barkley Side Effect Rating Scale; K-SADS-PL, Kiddie-Schedule for Affective Disorders and Schizophrenia-Present and Lifetime Version; DISC, Diagnostic Interview Schedule for Children; SKAMP, Swanson, Conners, Milich, and Pelham Scale; CLAM, Conners, Loney, and Milich Scale; ICD-10, 10<sup>th</sup> revision of the International Statistical Classification of Diseases and Related Health Problems; CPRS-R:L, Conners’ Parent Rating Scale-revised: Long Version; MAGIC, Missouri Assessment for Genetics Interview for Children; CAPA, Child and Adolescent Psychiatric Assessment; ABRIS, Conners’ Abbreviated Rating Scale.

## Supplementary Table 1: Included Study Demographics

Text Summary: An inclusive overview of demographics and study content for all research studies included in the meta-analysis

|                                |        |                    |                     |                                                                                                    |                                                                   | 0.65mg/kg/day <sup>1</sup>                                                                                                                    |                | Impulsivity subscale<br>Barkley SERS                                         |                                                           |                                                                                                         |
|--------------------------------|--------|--------------------|---------------------|----------------------------------------------------------------------------------------------------|-------------------------------------------------------------------|-----------------------------------------------------------------------------------------------------------------------------------------------|----------------|------------------------------------------------------------------------------|-----------------------------------------------------------|---------------------------------------------------------------------------------------------------------|
| da Silva et al (2008)          | ADRA2A | rs1800544<br>(G/C) | 59 (45/14) 12.2     | -                                                                                                  | Observational; Single<br>Arm; Open Label                          | 0.63 mg/kg/day <sup>1</sup>                                                                                                                   | SNAP-IV, CGAS  | -                                                                            | Poor Response                                             | G allele associated with<br>improved response                                                           |
| Froehlich et al (2011)         | ADRA2A | rs1800544<br>(G/C) | 89 (65/24) 8.1      | White (79%), Black<br>(18%),<br>Hispanic/Latino<br>(2%), Other (1%)                                | Randomized; Cross-<br>Over; Double Blind                          | 1.57mg/kg/day <sup>5</sup>                                                                                                                    | VADPRS, VADTRS | -                                                                            | Poor Response; Gene x<br>Dose Interaction                 | G allele associated with<br>poorer response                                                             |
| Kim et al (2013)               | ADRA2A | rs1800544<br>(G/C) | 101 (82/19) 8.7     | -                                                                                                  | Observational; Single<br>Arm; Open Label                          | Baseline:<br>0.24mg/kg/day <sup>1</sup><br>0.98mg/kg/day <sup>3</sup>                                                                         | K-ARS, CAT     | -                                                                            | Poor Response                                             | G allele carriers had more<br>reduction in response time<br>variability in flanker<br>interference task |
| Cheon et al (2008)             | COMT   | rs4680<br>(G/A)    | 124 (106/18)<br>8.6 | Korean                                                                                             | Observational; Single<br>Arm; Open Label                          | 25.81mg/day <sup>3</sup>                                                                                                                      | ARS-IV         | -                                                                            | Poor Response                                             | Val/Val (G/G) associated<br>with improved response<br>(trend by parent, sig. by<br>teacher scale)       |
| Kereszturi et al (2008)        | COMT   | rs4680<br>(G/A)    | 122 (108/14)<br>9.6 | -                                                                                                  | Observational; Single<br>Arm; Open Label                          | 0.55mg/kg/day <sup>1</sup>                                                                                                                    | ARS-IV, CGI-S  | -                                                                            | Poor Response                                             | Val (G) allele associated<br>with improved response                                                     |
| McGough et al (2009)           | COMT   | rs4680<br>(G/A)    | 82 (63/19) 9.8      | Non-Hispanic<br>white (51%),<br>Hispanic white<br>(24%), Black (13%),<br>Asian (9%), Other<br>(2%) | Randomized; Cross-<br>Over; Double Blind                          | Patients weighing<br><25kg: one week each<br>of 5mg,10mg,15mg<br>three times daily.<br>>25kg: additional week<br>of 20mg three times<br>daily | ARS-IV, SWAN   | PERMP                                                                        | Poor Response; Gene x<br>Dose Interaction<br>Side Effects | Trend association of Val<br>(G) with improved<br>response                                               |
| Salatino-Oliveira et al (2011) | COMT   | rs4680<br>(G/A)    | 112 (112/0) 9.5     | European-Brazilian                                                                                 | Observational; Single<br>Arm; Open Label                          | Baseline:<br>0.5mg/kg/day<br>1 month:<br>0.65mg/kg/day <sup>1</sup>                                                                           | SNAP-IV        | -                                                                            | Poor Response;<br>Response Rate                           | Met (A) allele associated<br>with improved response                                                     |
| Froehlich et al (2011)         | COMT   | rs4680<br>(G/A)    | 89 (65/24) 8.1      | White (79%), Black<br>(18%),<br>Hispanic/Latino<br>(2%), Other (1%)                                | Randomized; Cross-<br>Over; Double Blind                          | 1.57mg/kg/day <sup>4*</sup>                                                                                                                   | VADPRS, VADTRS | -                                                                            | Poor Response; Gene x<br>Dose Interaction                 | No significant association,<br>but trend of Val/Val (G/G)<br>with symptom<br>improvement                |
| Yatsuga et al (2014)           | COMT   | rs4680<br>(G/A)    | 50 (50/0) 9.7       | -                                                                                                  | Observational; Case<br>Control                                    | 0.5-1.2mg/kg/day<br>depending on age and<br>weight                                                                                            | ARS-IV         | -                                                                            | Poor Response<br>Side Effects                             | No association                                                                                          |
| Park et al (2014)              | COMT   | rs4680<br>(G/A)    | 120 (100/20)<br>8.9 | -                                                                                                  | Observational; Single<br>Arm; Open Label                          | 30.71mg <sup>3</sup>                                                                                                                          | ARS-IV         | CPT<br>CGI-I                                                                 | Poor Response;<br>Response Rate                           | Val/Val (G/G) associated<br>with improved response                                                      |
| Choudhry et al (2012)          | LPHN3  | rs6551665<br>(G/A) | 154 (-/-) 9         | -                                                                                                  | Randomized; Cross-<br>Over; Double Blind                          | 0.5mg/kg/day <sup>5</sup>                                                                                                                     | CGI-I          | Conners' Parent,<br>Conners' Teacher,<br>CBCL<br>WCST, FW, TOL,<br>SOPT, CPT | Poor Response                                             | G allele associated with<br>improved response                                                           |
| Labbe et al (2012)             | LPHN3  | rs6551665<br>(G/A) | 416 (319/97) 9      | -                                                                                                  | Randomized;<br>Placebo-controlled;<br>Cross-Over; Double<br>Blind | 0.5mg/kg/day <sup>2</sup>                                                                                                                     | RAST           | DA, CPT, SOPT, FW                                                            | Poor Response                                             | G allele associated with<br>poorer response                                                             |

## Supplementary Table 1: Included Study Demographics

Text Summary: An inclusive overview of demographics and study content for all research studies included in the meta-analysis

|                        |       |                 |                   |                                                                                     |                                                          |                                                                                                                             |                     |                                                                                              |                                                        |                                             |
|------------------------|-------|-----------------|-------------------|-------------------------------------------------------------------------------------|----------------------------------------------------------|-----------------------------------------------------------------------------------------------------------------------------|---------------------|----------------------------------------------------------------------------------------------|--------------------------------------------------------|---------------------------------------------|
| Song et al (2014)      | LPHN3 | rs6551665 (G/A) | 137 (-/-) 10      | -                                                                                   | Observational; Single Arm; Open Label                    | 31mg/day <sup>5</sup>                                                                                                       | CGI-I               | K-ARS (ARS-IV)                                                                               | Poor Response                                          | No association                              |
| Bruxel et al (2015)    | LPHN3 | rs6551665 (G/A) | 172 (132/40) 10.6 | European-Brazilian, African-Brazilian                                               | Observational                                            | Baseline: 0.3mg/kg/day; 1 month:0.47mg/kg/day; After first month: 0.60 mg/kg/day <sup>7</sup>                               | SNAP-IV             | -                                                                                            | Poor Response; Response Rate                           | G allele associated with improved response  |
| Choudhry et al (2012)  | LPHN3 | rs1947274 (C/A) | 154 (-/-) 9       | -                                                                                   | Randomized; Cross-Over; Double Blind                     | 0.5mg/kg/day <sup>2</sup>                                                                                                   | CGI-I               | Conners' Parent, Conners' Teacher, CBCL Neuropsychological battery: WCST, FW, TOL, SOPT, CPT | Poor Response                                          | A allele associated with improved response  |
| Labbe et al (2012)     | LPHN3 | rs1947274 (C/A) | 416 (319/97) 9    | -                                                                                   | Randomized; Placebo-controlled; Cross-Over; Double Blind | 0.5mg/kg/day <sup>2</sup>                                                                                                   | RAST                | DA, CPT, SOPT, FW                                                                            | Poor Response                                          | A allele associated with poorer response    |
| Song et al (2014)      | LPHN3 | rs1947274 (C/A) | 139 (120/19) 10   | -                                                                                   | Observational; Single Arm; Open Label                    | 31mg/day <sup>3</sup>                                                                                                       | CGI-I               | K-ARS (ARS-IV)                                                                               | Poor Response                                          | No association                              |
| McGough et al (2006)   | DRD4  | 4-repeat VNTR   | 52 (-/-) 4.3      | White (59%), Black or African American (15%), Hispanic or Latino (25%), Other (1%)  | Randomized; Cross-Over; Double Blind                     | 1 week of each dose at 1.25, 2.5, 5, and 7.5 mg/day (Effect sizes reported for weight-adjusted means at 7.5-mg dose)        | SKAMP, CLAM         | -                                                                                            | Poor Response                                          | 4R/4R associated with improved response     |
| Cheon et al (2007)     | DRD4  | 4-repeat VNTR   | 83 (72/11) 8.4    | Korean                                                                              | Observational; Single Arm; Open Label                    | 20.67mg/day <sup>1</sup>                                                                                                    | ARS-IV              | -                                                                                            | Poor Response                                          | 4R/4R associated with improved response     |
| McGough et al (2009)   | DRD4  | 4-repeat VNTR   | 81 (-/-) 9.8      | Non-Hispanic white (51%), Hispanic white (24%), Black (13%), Asian (9%), Other (2%) | Randomized; Cross-Over; Double Blind                     | Patients weighing <25kg: one week each of 5mg,10mg,15mg three times daily. >25kg: additional week of 20mg three times daily | ARS-IV, SWAN        | PERMP                                                                                        | Poor Response; Gene x Dose Interaction<br>Side Effects | No association                              |
| Froehlich et al (2011) | DRD4  | 4-repeat VNTR   | 89 (65/24) 8.1    | White (79%), Black (18%), Hispanic/Latino (2%), Other (1%)                          | Randomized; Cross-Over; Double Blind                     | 1.57mg/kg/day <sup>5*</sup>                                                                                                 | VADPRS, VADTRS      | -                                                                                            | Poor Response; Gene x Dose Interaction                 | 4R allele associated with improved response |
| Hong et al (2012)      | DRD4  | 4-repeat VNTR   | 103 (-/-) 9.1     | Korean                                                                              | Observational; Single Arm; Open Label                    | Baseline: 19.8mg/day <sup>1</sup><br>At 8 weeks: 29.1mg/day <sup>3</sup>                                                    | ARS-IV, CGI-I       | -                                                                                            | Poor Response                                          | No association                              |
| Ji et al (2013)        | DRD4  | 4-repeat VNTR   | 114 (90/24) 8.9   | Korean                                                                              | Observational; Single Arm; Open Label                    | Titration starting as 18mg/day and increase weekly in 9mg/day increments, maximum at 36mg/day*                              | CGI-I, CGI-S, K-ARS | -                                                                                            | Poor Response                                          | No association                              |
| Seeger et al (2001)    | DRD4  | 7-repeat VNTR   | 47 (-/-) 10       | -                                                                                   | Observational; Case Control                              | 0.6-0.8mg/kg/day                                                                                                            | CGAS                | -                                                                                            | Poor Response                                          | No association                              |

## Supplementary Table 1: Included Study Demographics

Text Summary: An inclusive overview of demographics and study content for all research studies included in the meta-analysis

|                            |        |                |                   |                                                                                     |                                       |                                                                                                                               |                                   |                              |                                                        |                                                       |
|----------------------------|--------|----------------|-------------------|-------------------------------------------------------------------------------------|---------------------------------------|-------------------------------------------------------------------------------------------------------------------------------|-----------------------------------|------------------------------|--------------------------------------------------------|-------------------------------------------------------|
| Hamarman et al (2004)      | DRD4   | 7-repeat VNTR  | 45 (35/10) 9.6    | African-American (82%), Hispanic (18%)                                              | Observational; Single Arm; Open Label | Dose advancement of 5mg at each session (3-14 days) until symptom normalization (max dose of 60mg)                            | Conners' Parent                   | -                            | Poor Response                                          | 7R allele associated with poorer response             |
| McGough et al (2006)       | DRD4   | 7-repeat VNTR  | 52 (-/-) 4.3      | White (59%), Black or African American (15%), Hispanic or Latino (25%), Other (1%)  | Randomized; Cross-Over; Double Blind  | 1 week each of 1.25, 2.5, 5, and 7.5 mg/day (Effect sizes reported for weight-adjusted means at 7.5-mg dose)                  | SKAMP, CLAM                       | -                            | Poor Response                                          | 7R allele associated with slightly poorer response    |
| Tharoor et al (2008)       | DRD4   | 7-repeat VNTR  | 159 (-/-) 12.8    | -                                                                                   | Observational                         | -                                                                                                                             | MAGIC                             | -                            | Poor Response                                          | No association                                        |
| Kereszturi et al (2008)    | DRD4   | 7-repeat VNTR  | 122 (108/14) 9.6  | -                                                                                   | Observational; Single Arm; Open Label | 0.55mg/kg/day <sup>1</sup>                                                                                                    | ARS-IV, CGI-S                     | -                            | Poor Response                                          | No association                                        |
| Winsberg et al (1999)      | SLC6A3 | 10-repeat VNTR | 30 (-/-) 8.3      | African American                                                                    | Observational; Single Arm; Open Label | Maximum of 60mg/day, not to exceed 0.7mg/kg                                                                                   | ABRS                              | -                            | Poor Response                                          | 10R/10R associated with poorer response               |
| Roman et al (2002)         | SLC6A3 | 10-repeat VNTR | 50 (50/0) -       | -                                                                                   | Observational; Single Arm; Open Label | 0.7mg/kg/day <sup>3</sup>                                                                                                     | ABRS, CGAS                        | -                            | Poor Response                                          | 10R/10R associated with poorer response               |
| Kirley et al (2003)        | SLC6A3 | 10-repeat VNTR | 119 (112/7) 11.9  | Caucasian (Irish)                                                                   | Observational                         | -                                                                                                                             | CPRS-R:L                          | Three-point scale            | Poor Response                                          | 10R allele associated with improved response          |
| Langley et al (2005)       | SLC6A3 | 10-repeat VNTR | 168 (-/-) 9       | Caucasian (British)                                                                 | Observational; Single Arm; Open Label | -                                                                                                                             | CGI-I                             | -                            | Poor Response                                          | No association                                        |
| Stein et al (2005)         | SLC6A3 | 10-repeat VNTR | 47 (33/14) 9      | Caucasian (89%), African American (4%), Hispanic (2%), Other (4%)                   | Randomized; Cross-Over; Double Blind  | Weekly titrations of 18mg, 36mg, and 54mg*                                                                                    | ARS-IV, CGI-S                     | -                            | Poor Response                                          | 10R allele carriers associated with improved response |
| Cheon et al (2005)         | SLC6A3 | 10-repeat VNTR | 11 (9/2) 9.8      | Korean                                                                              | Observational; Single Arm; Open Label | 0.3-0.7mg/kg/day                                                                                                              | ARS-IV                            | -                            | Poor Response                                          | 10R/10R associated with improved response             |
| McGough et al (2006)       | SLC6A3 | 10-repeat VNTR | 55 (-/-) 4.3      | White (59%), Black or African American (15%), Hispanic or Latino (25%), Other (1%)  | Randomized; Cross-Over; Double Blind  | 1 week of each dose at 1.25, 2.5, 5, and 7.5 mg/day (Effect sizes reported for weight-adjusted means at 7.5-mg dose)          | SKAMP, CLAM                       | -                            | Poor Response                                          | No association                                        |
| Gilbert et al (2006)       | SLC6A3 | 10-repeat VNTR | 16 (14/2) 12.3    | Caucasian (75%), African American (25%)                                             | Randomized; Cross-Over; Double Blind  | ~0.5mg/kg/day <sup>1</sup>                                                                                                    | ARS-IV                            | -                            | Poor Response                                          | 10R/10R associated with poorer response               |
| Joober et al (2007)        | SLC6A3 | 10-repeat VNTR | 151 (129/22) 8.9  | -                                                                                   | Randomized; Cross-Over; Double Blind  | 0.5mg/kg/day <sup>2</sup>                                                                                                     | Conners' Parent, Conners' Teacher | -                            | Poor Response                                          | 10R allele associated with improved response          |
| Purper-Ouakil et al (2008) | SLC6A3 | 10-repeat VNTR | 141 (124/17) 10.3 | -                                                                                   | Observational; Single Arm; Open Label | 31.16mg <sup>3*/**</sup>                                                                                                      | CGI-S, ARS-IV                     | -                            | Poor Response                                          | 10R/10R associated with poorer response               |
| Kereszturi et al (2008)    | SLC6A3 | 10-repeat VNTR | 122 (108/14) 9.6  | Hungarian                                                                           | Observational; Single Arm; Open Label | 0.55mg/kg/day <sup>1</sup>                                                                                                    | ARS-IV, CGI-S                     | -                            | Poor Response                                          | No association                                        |
| Tharoor et al (2008)       | SLC6A3 | 10-repeat VNTR | 159 (-/-) 12.8    | -                                                                                   | Observational                         | -                                                                                                                             | MAGIC                             | -                            | Poor Response                                          | 10R/10R associated with poorer response               |
| Bellgrove et al (2008)     | SLC6A3 | 10-repeat VNTR | 26 (22/4) 9.1     | -                                                                                   | Observational; Single Arm; Open Label | 0.59mg/kg/day <sup>1</sup>                                                                                                    | Conners' Parent                   | Landmark Task (spatial bias) | Poor Response                                          | No association                                        |
| McGough et al (2009)       | SLC6A3 | 10-repeat VNTR | 79 (-/-) 9.8      | Non-Hispanic white (51%), Hispanic white (24%), Black (13%), Asian (9%), Other (2%) | Randomized; Cross-Over; Double Blind  | Patients weighing <25kg: one week each of 5mg, 10mg, 15mg three times daily. >25kg: additional week of 20mg three times daily | ARS-IV, SWAN                      | PERMP                        | Poor Response; Gene x Dose Interaction<br>Side Effects | No association                                        |

### Supplementary Table 1: Included Study Demographics

Text Summary: An inclusive overview of demographics and study content for all research studies included in the meta-analysis

|                        |        |                |                |                                                            |                                       |                                                          |                |   |                                        |                                            |
|------------------------|--------|----------------|----------------|------------------------------------------------------------|---------------------------------------|----------------------------------------------------------|----------------|---|----------------------------------------|--------------------------------------------|
| Froehlich et al (2011) | SLC6A3 | 10-repeat VNTR | 89 (65/24) 8.1 | White (79%), Black (18%), Hispanic/Latino (2%), Other (1%) | Randomized; Cross-Over; Double Blind  | 1.57mg/kg/day <sup>5*</sup>                              | VADPRS, VADTRS | - | Poor Response; Gene x Dose Interaction | 10R allele associated with poorer response |
| Hong et al (2012)      | SLC6A3 | 10-repeat VNTR | 103 (-/-) 9.1  | Korean                                                     | Observational; Single Arm; Open Label | Baseline: 19.8mg/day<br>8 weeks: 29.1mg/day <sup>1</sup> | ARS-IV, CGI-I  | - | Poor Response                          | No association                             |
